# Supplementary material for: Alkoxythiophene and alkylthiothiophene π-bridges enhance the performance of A–D–A electron acceptors
Source: Royal Society of Chemistry journal article supplement (doi:10.1039/c8qm00647d), 2019-01-01
Supplement: c8qm00647d1.pdf [file c8qm00647d1.pdf]

## Supporting Information

### **Alkoxythiophene and alkylthiothiophene $\pi$ -bridges enhance the performance of A-D-A electron acceptors**

Lei Zhang,<sup>‡a,b</sup> Ke Jin,<sup>‡b</sup> Zuo Xiao,<sup>b</sup> Xingzhu Wang,<sup>\*a</sup> Tao Wang,<sup>\*c</sup> Chenyi Yi<sup>\*d</sup> and Liming Ding<sup>\*b</sup>

<sup>a</sup>*College of Chemistry, Xiangtan University, Xiangtan, Hunan 411105, China. E-mail: xzwang@xtu.edu.cn*

<sup>b</sup>*Center for Excellence in Nanoscience (CAS), Key Laboratory of Nanosystem and Hierarchical Fabrication (CAS), National Center for Nanoscience and Technology, Beijing 100190, China. E-mail: ding@nanoctr.cn*

<sup>c</sup>*School of Materials Science and Engineering, Wuhan University of Technology, Wuhan 430070, China. E-mail: twang@whut.edu.cn*

<sup>d</sup>*Department of Electrical Engineering, Tsinghua University, Beijing 100084, China. E-mail: yicy@tsinghua.edu.cn*

<sup>‡</sup> L. Zhang and K. Jin contributed equally to this work.

#### **1. General characterization**

#### **2. Synthesis**

#### **3. NMR**

#### **4. UV-Vis**

#### **5. CV**

#### **6. Device fabrication and measurements**

#### **7. Optimization of device performance**

#### **8. Exciton dissociation probabilities**

#### **9. SCLC**

#### **10. Bimolecular recombination**

#### **11. AFM**

## 1. General characterization

$^1\text{H}$  and  $^{13}\text{C}$  NMR spectra were measured on a Bruker Avance-400 spectrometer. Absorption spectra were recorded on a Shimadzu UV-1800 spectrophotometer. Cyclic voltammetry was done by using a Shanghai Chenhua CHI620D voltammetric analyzer under argon in an anhydrous acetonitrile solution of tetra-*n*-butylammonium hexafluorophosphate (0.1 M). A glassy-carbon electrode was used as the working electrode, a platinum-wire was used as the counter electrode, and a Ag/Ag<sup>+</sup> electrode was used as the reference electrode. The donor or acceptor was coated onto glassy-carbon electrode and all potentials were corrected against Fc/Fc<sup>+</sup>. AFM was performed on a Multimode microscope (Veeco) by using tapping mode.

## 2. Synthesis

All reagents were purchased from J&K Co., Aladdin Co., Innochem Co., Derthon Co., Adamas-beta and other commercial suppliers. CO5<sup>[1]</sup>, CO5-CHO<sup>[1]</sup>, 2-bromo-3-(octylthio)thiophene<sup>[2]</sup> and 5-bromo-4-(octyloxy)thiophene-2-carbaldehyde<sup>[3]</sup> were prepared according to literature.

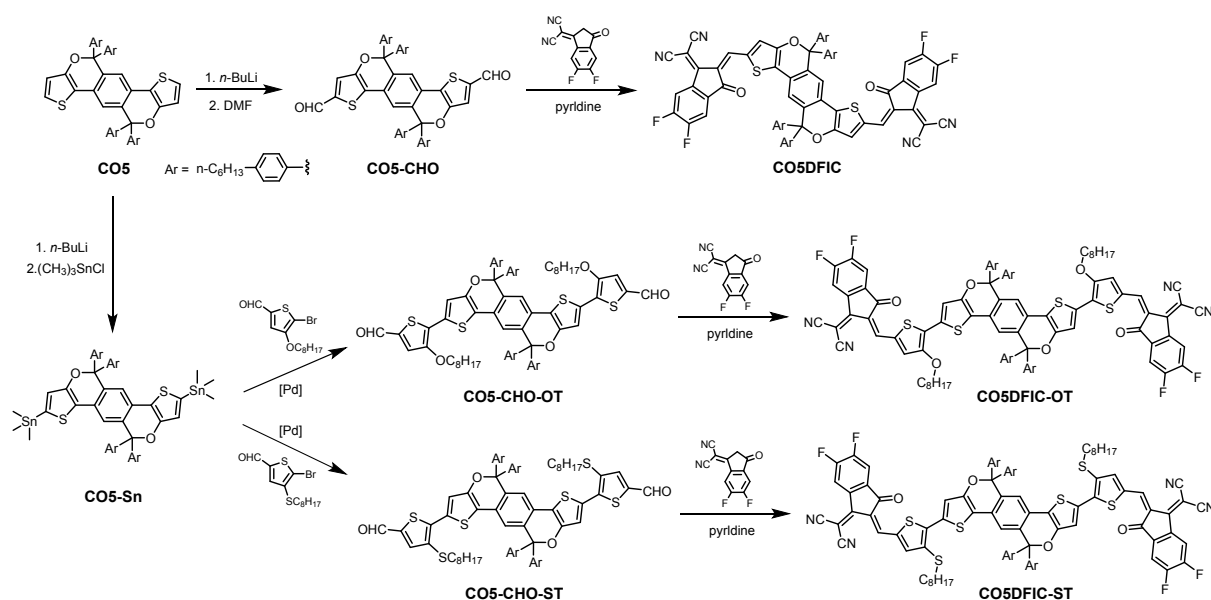

**Scheme S1** The synthetic routes for CO5DFIC, CO5DFIC-OT and CO5DFIC-ST.

**5-Bromo-4-(octylthio)thiophene-2-carbaldehyde.** To a solution of 2-bromo-3-(octylthio)thiophene (240 mg, 0.78 mmol) in dry THF (10 mL) was added LDA (0.47 mL, 2 M, 0.94 mmol) at -78 °C under argon. The resulting mixture was stirred for 2 h. To the

mixture was added N,N-dimethylformamide (75.4  $\mu$ L, 0.94 mmol). Then, the mixture was warmed to -40  $^{\circ}$ C and stirred for 1 h. It was then poured into water followed by extraction with CH<sub>2</sub>Cl<sub>2</sub> three times. The combined organic layer was dried over anhydrous Na<sub>2</sub>SO<sub>4</sub>. After removal of the solvent, the crude product was purified via column chromatography (silica gel) by using CH<sub>2</sub>Cl<sub>2</sub>:petroleum ether (1:2) as eluent to give **5-bromo-4-(octylthio)thiophene-2-carbaldehyde** as a colourless liquid (170 mg, 65%). <sup>1</sup>H NMR (400 MHz, CDCl<sub>3</sub>  $\delta$ /ppm): 9.76 (s, 1H), 7.56 (s, 1H), 2.89 (t, *J* = 7.3 Hz, 2H), 1.49-1.74 (m, 2H), 1.13-1.47 (m, 10H), 0.87 (t, *J* = 4.4 Hz, 3H). <sup>13</sup>C NMR (100 MHz, CDCl<sub>3</sub>): 181.37, 143.08, 137.99, 135.87, 128.58, 35.13, 31.73, 29.41, 29.01, 29.04, 28.54, 22.60, 14.07.

**CO5DFIC**. To a solution of CO5-CHO (70 mg, 0.07 mmol) in CHCl<sub>3</sub> (10 mL) was added DFIC (81 mg, 0.35 mmol) and pyridine (0.5 mL) at room temperature. The mixture was heated to reflux for 1 h. After removal of the solvent, the crude product was purified via column chromatography (silica gel) by using CHCl<sub>3</sub> as eluent to give **CO5DFIC** as a black solid (100 mg, 95%). <sup>1</sup>H NMR (400 MHz, CDCl<sub>3</sub>  $\delta$ /ppm): 8.62 (s, 2H), 8.48-8.55 (m, 2H), 7.58-7.67 (m, 4H), 7.17 (m, 16H), 6.92 (s, 2H), 2.63 (t, *J* = 7.7 Hz, 8H), 1.59-1.65 (m, 8H), 1.24-1.39 (m, 24H), 0.85 (t, *J* = 6.7 Hz, 12H). <sup>13</sup>C NMR (CDCl<sub>3</sub>, 100 MHz,  $\delta$ /ppm): 185.47, 157.94, 155.90, 155.77, 154.08, 153.29, 153.16, 143.56, 139.03, 137.30, 134.99, 134.89, 134.44, 134.31, 133.10, 128.52, 128.26, 128.23, 123.70, 122.94, 115.10, 114.88, 113.96, 113.77, 112.75, 89.09, 70.66, 70.65, 35.60, 31.68, 31.14, 29.01, 22.56, 14.06. MALDI-TOF MS (*m/z*): 1420.2 (M<sup>+</sup>).

**CO5-Sn**. To a solution of CO5 (300 mg, 0.32 mmol) in dry THF (20 mL) was added *n*-BuLi (0.5 mL, 1.6 M, 0.8 mmol) at -78  $^{\circ}$ C under argon. The resulting mixture was stirred for 1 h. The mixture was warmed to 0  $^{\circ}$ C and stirred for 2 h. To the resulting mixture was added chlorotrimethylstannane (0.96 mL, 1.0 M, 0.96 mmol). The mixture was stirred overnight. It was then poured into water followed by extraction with CH<sub>2</sub>Cl<sub>2</sub> three times. The combined organic layer was dried over anhydrous Na<sub>2</sub>SO<sub>4</sub>. After removal of the solvent to give **CO5-Sn** as a light yellow solid (310 mg, 77%). <sup>1</sup>H NMR (400 MHz, CDCl<sub>3</sub>  $\delta$ /ppm): 7.10-7.16 (m, 16H), 6.80 (s, 2H), 6.54 (s, 2H), 2.59 (t, *J* = 7.7 Hz, 8H), 1.56-1.62 (m, 8H), 1.30-1.34 (m, 24H), 0.87 (t, *J* = 6.6 Hz, 12H), 0.29 (s, 18H). <sup>13</sup>C NMR (CDCl<sub>3</sub>, 100 MHz,  $\delta$ /ppm): 153.30, 142.45, 140.82, 135.99, 132.85, 128.56, 127.76, 126.66, 126.62, 121.96, 121.70, 88.70, 35.58, 31.71, 31.17, 28.97, 22.60, 14.11, -8.29. MALDI-TOF MS (*m/z*): 1264.9 (M<sup>+</sup>).

**CO5-CHO-OT.** To a solution of CO5-Sn (120 mg, 0.09 mmol) and 5-bromo-4-(octyloxy)thiophene-2-carbaldehyde (75 mg, 0.23 mmol) in dry toluene (10 mL) and DMF (1 mL) was added Pd(PPh<sub>3</sub>)<sub>4</sub> (11 mg, 0.01 mmol) under argon. The mixture was stirred at 110 °C for 12 h. After removal of the solvent, the crude product was purified via column chromatography (silica gel) by using CH<sub>2</sub>Cl<sub>2</sub>:petroleum ether (2:1) as eluent to give **CO5-CHO-OT** as a red solid (87 mg, 65%). <sup>1</sup>H NMR (400 MHz, CDCl<sub>3</sub> δ/ppm): 9.71 (s, 2H), 7.39 (br, 2H), 7.11-7.18 (m, 16H), 6.52 (br, 2H), 4.10 (br, 4H), 2.57-2.61 (m, 8H), 1.76-1.84 (m, 4H), 1.57-1.64 (m, 8H), 1.25-1.47 (m, 44H), 0.84-0.88 (m, 18H). <sup>13</sup>C NMR (CDCl<sub>3</sub>, 100 MHz, δ/ppm): 181.59 (br), 160.56, 153.70 (br), 152.24 (br), 142.85, 140.11, 136.20 (br), 133.92, 133.91, 131.17 (br), 128.50, 127.85, 126.65 (br), 123.34 (br), 121.37, 116.99 (br), 88.75, 72.05, 35.63, 31.76, 31.70, 31.24, 29.21, 29.09, 25.77, 22.64, 22.59, 14.09, 14.07. MALDI-TOF MS (m/z): 1415.2 (M<sup>+</sup>).

**CO5DFIC-OT.** To a solution of CO5OT-CHO (60 mg, 0.042 mmol) in CHCl<sub>3</sub> (10 mL) was added DFIC (49 mg, 0.21 mmol) and pyridine (0.5 mL) at room temperature. The mixture was heated to reflux for 1 h. After removal of the solvent, the crude product was purified via column chromatography (silica gel) by using CHCl<sub>3</sub> as eluent to give **CO5DFIC-OT** as a black solid (78 mg, 73%). <sup>1</sup>H NMR (400 MHz, δ/ppm): 8.64 (br, 2H), 8.48 (m, 2H), 7.62 (t, *J* = 7.5 Hz, 2H), 7.41 (br, 2H), 7.35 (br, 2H), 7.13-7.21 (m, 16H), 6.60 (br, 2H), 4.12 (br, 4H), 2.60-2.64 (m, 8H), 1.79-1.88 (m, 4H), 1.57-1.67 (m, 8H), 1.21-1.42 (m, 44H), 0.84-0.86 (m, 18H). <sup>13</sup>C NMR (CDCl<sub>3</sub>, 100 MHz, δ/ppm): 185.75, 157.76 (br), 156.18, 155.60, 155.46, 153.00, 152.87, 142.99, 139.87, 136.52, 136.44, 135.90 (br), 135.66 (br), 134.39, 134.33, 134.30, 134.25, 132.00 (br), 131.41 (br), 129.88 (br), 129.37 (br), 128.40, 127.95, 127.15 (br), 122.57 (br), 121.59, 118.88 (br), 118.54 (br), 114.87, 114.65, 114.48, 112.44, 112.25, 88.77, 72.19, 68.83, 35.70, 31.78, 31.70, 31.25, 29.26, 29.16, 25.77, 22.66, 22.58, 14.10, 14.06. MALDI-TOF MS (m/z): 1840.6 (M<sup>+</sup>).

**CO5-CHO-ST.** To a solution of CO5-Sn (135 mg, 0.11 mmol) and 5-bromo-4-(octylthio)thiophene-2-carbaldehyde (89 mg, 0.27 mmol) in dry toluene (10 mL) and DMF (1 mL) was added Pd(PPh<sub>3</sub>)<sub>4</sub> (12 mg, 0.01 mmol) under argon. The mixture was stirred at 110 °C for 12 h. After removal of the solvent, the crude product was collected and purified via column chromatography (silica gel) by using CH<sub>2</sub>Cl<sub>2</sub>:petroleum ether (2:1) as eluent to give **CO5-CHO-ST** as a red solid (97 mg, 63%). <sup>1</sup>H NMR (400 MHz, CDCl<sub>3</sub> δ/ppm): 9.78 (s, 2H), 7.60 (s, 2H), 7.32 (s, 2H), 7.13-7.18 (m, 16H), 6.59 (s, 2H), 2.82 (t, *J* = 7.3 Hz, 4H), 2.60 (t, *J*

= 7.6 Hz, 8H), 1.53-1.65 (m, 12H), 1.22-1.38 (m, 44H), 0.85-0.88 (m, 18H).  $^{13}\text{C}$  NMR ( $\text{CDCl}_3$ , 100 MHz,  $\delta/\text{ppm}$ ): 181.85, 152.29, 144.44, 143.01, 140.68, 139.89, 139.11, 134.26, 131.65, 129.69, 128.52, 127.94, 126.72, 121.71, 120.24, 119.67, 88.90, 36.01, 35.61, 31.75, 31.69, 31.22, 29.38, 29.10, 29.04, 28.64, 22.60, 14.08. MALDI-TOF MS ( $m/z$ ): 1448.5 ( $\text{M}^+$ ).

**CO5DFIC-ST.** To a solution of CO5ST-CHO (70 mg, 0.048 mmol) in  $\text{CHCl}_3$  (10 mL) was added DFIC (56 mg, 0.24 mmol) and pyridine (0.5 mL) at room temperature. The mixture was heated to reflux for 1 h. After removal of the solvent, the crude product was purified via column chromatography (silica gel) by using  $\text{CHCl}_3$  as eluent to give **CO5DFIC-ST** as a black solid (77 mg, 85%).  $^1\text{H}$  NMR (400 MHz,  $\text{CDCl}_3$   $\delta/\text{ppm}$ ): 8.65 (s, 2H), 8.49-8.53 (m, 2H), 7.61-7.68 (m, 4H), 7.50 (s, 2H), 7.14-7.23 (m, 16H), 6.68 (s, 2H), 2.90 (t,  $J = 7.3$  Hz, 4H), 2.61-2.65 (m, 8H), 1.58-1.67 (m, 12H), 1.26-1.42 (m, 44H), 0.85-0.88 (m, 18H).  $^{13}\text{C}$  NMR ( $\text{CDCl}_3$ , 100 MHz,  $\delta/\text{ppm}$ ): 185.89, 157.79, 155.87, 155.73, 153.20, 150.08, 148.51, 143.14, 139.74, 136.60, 136.33, 134.77, 134.43, 134.40, 134.36, 133.66, 131.98, 128.53, 128.03, 127.04, 122.75, 122.09, 121.98, 120.57, 155.06, 144.85, 144.05, 113.99, 112.77, 112.58, 89.01, 70.28, 70.27, 35.83, 35.64, 31.75, 31.68, 31.21, 29.16, 29.11, 29.08, 29.06, 28.69, 22.61, 22.58, 14.07. MALDI-TOF MS ( $m/z$ ): 1872.2 ( $\text{M}^+$ ).

### 3. NMR

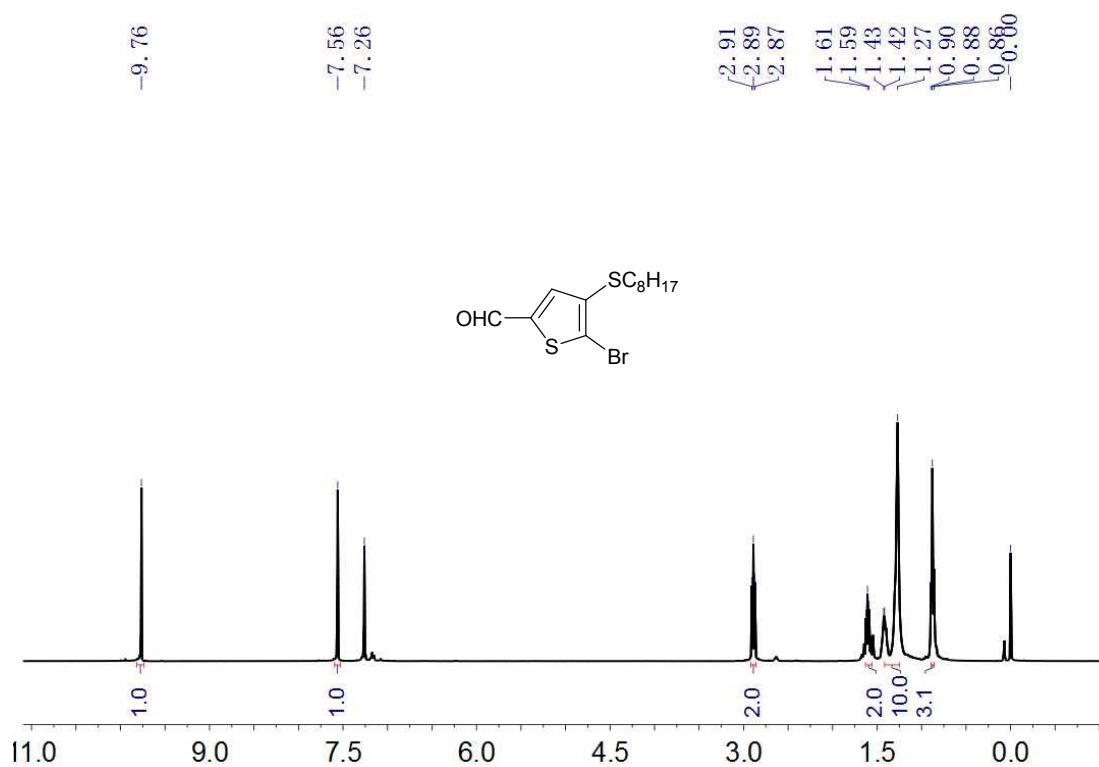

Fig. S1 <sup>1</sup>H NMR spectrum of **5-bromo-4-(octylthio)thiophene-2-carbaldehyde**.

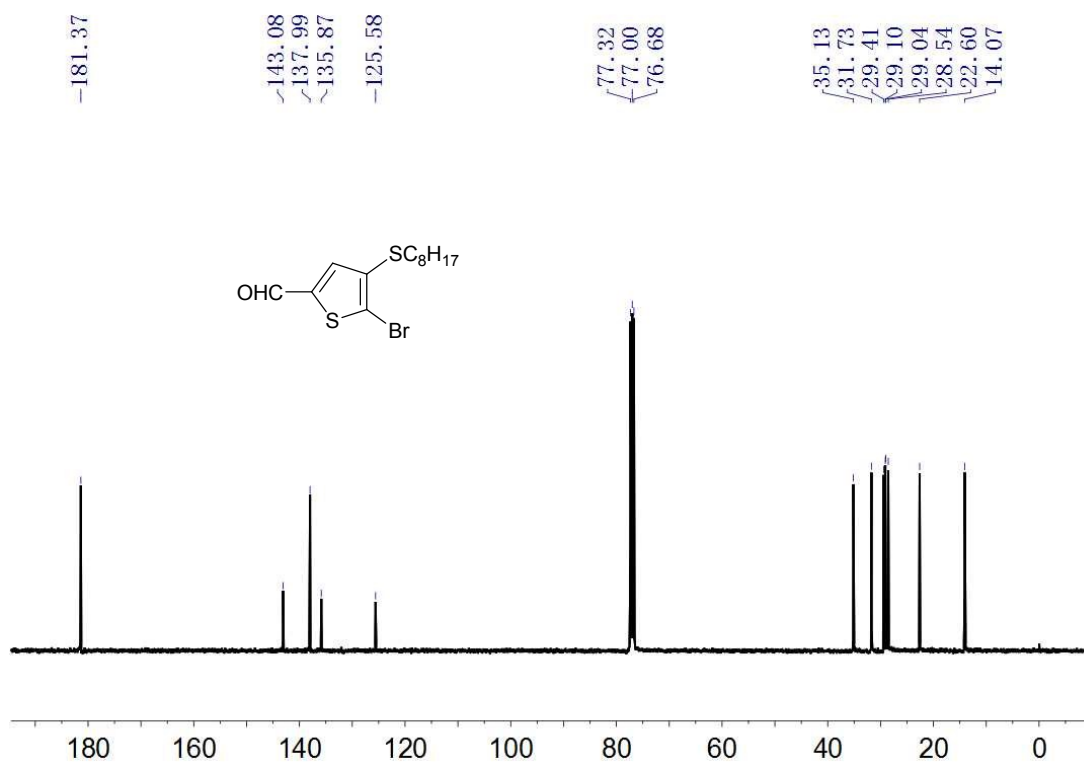

Fig. S2 <sup>13</sup>C NMR spectrum of **5-bromo-4-(octylthio)thiophene-2-carbaldehyde**.

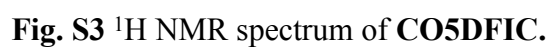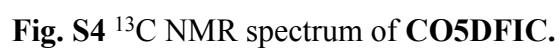

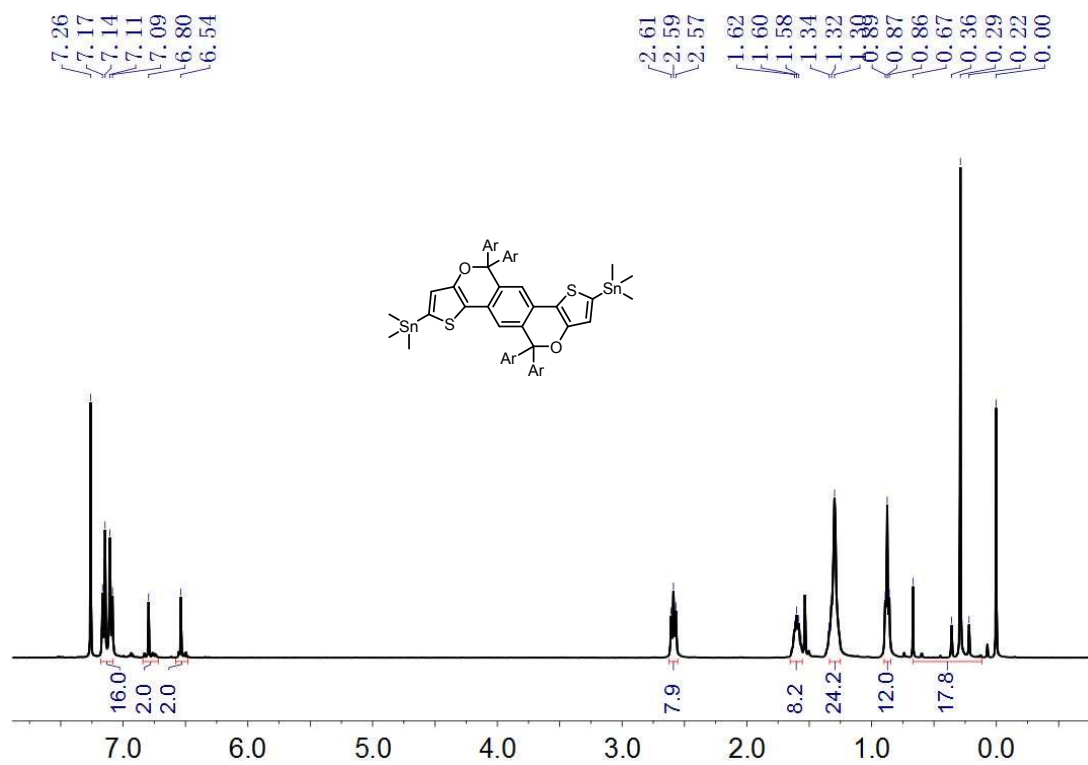

**Fig. S5** <sup>1</sup>H NMR spectrum of CO5-Sn.

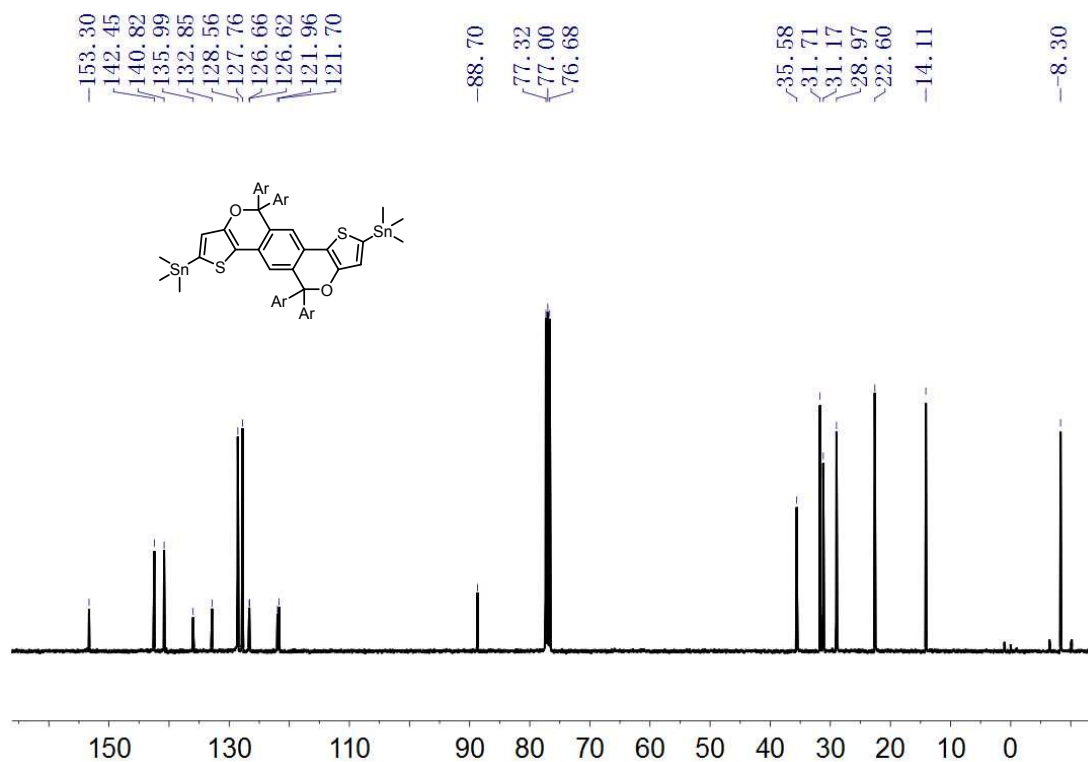

**Fig. S6** <sup>13</sup>C NMR spectrum of CO5-Sn.



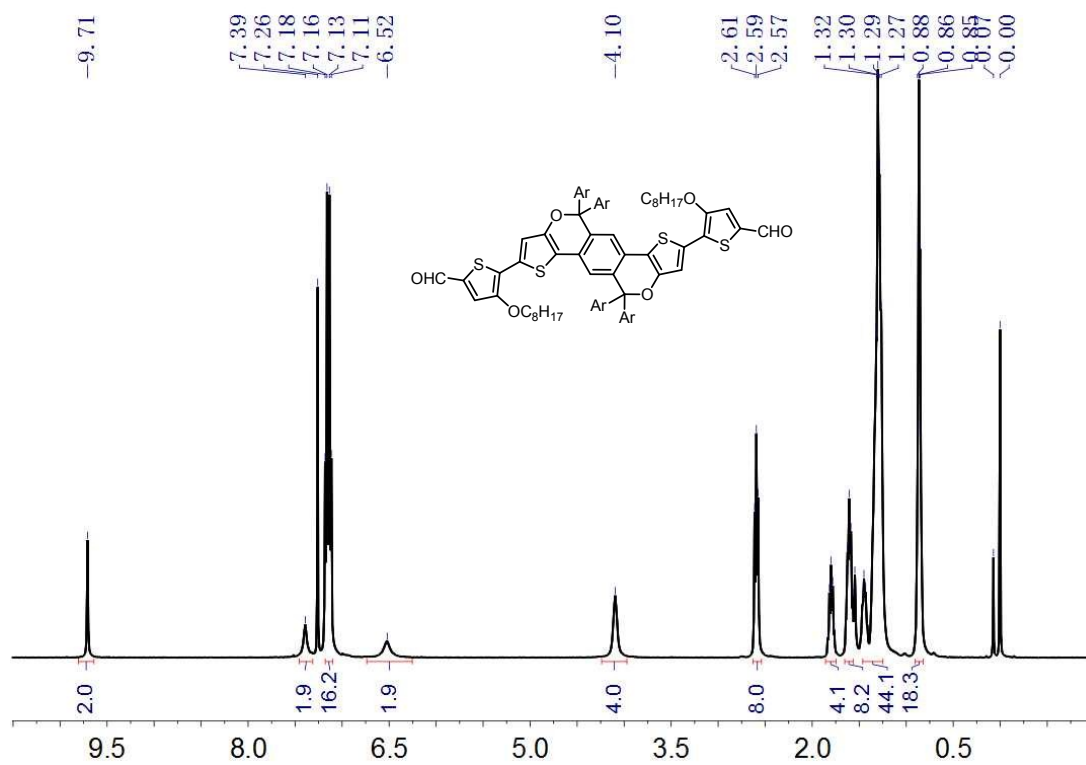

Fig. S7 <sup>1</sup>H NMR spectrum of CO5-CHO-OT.

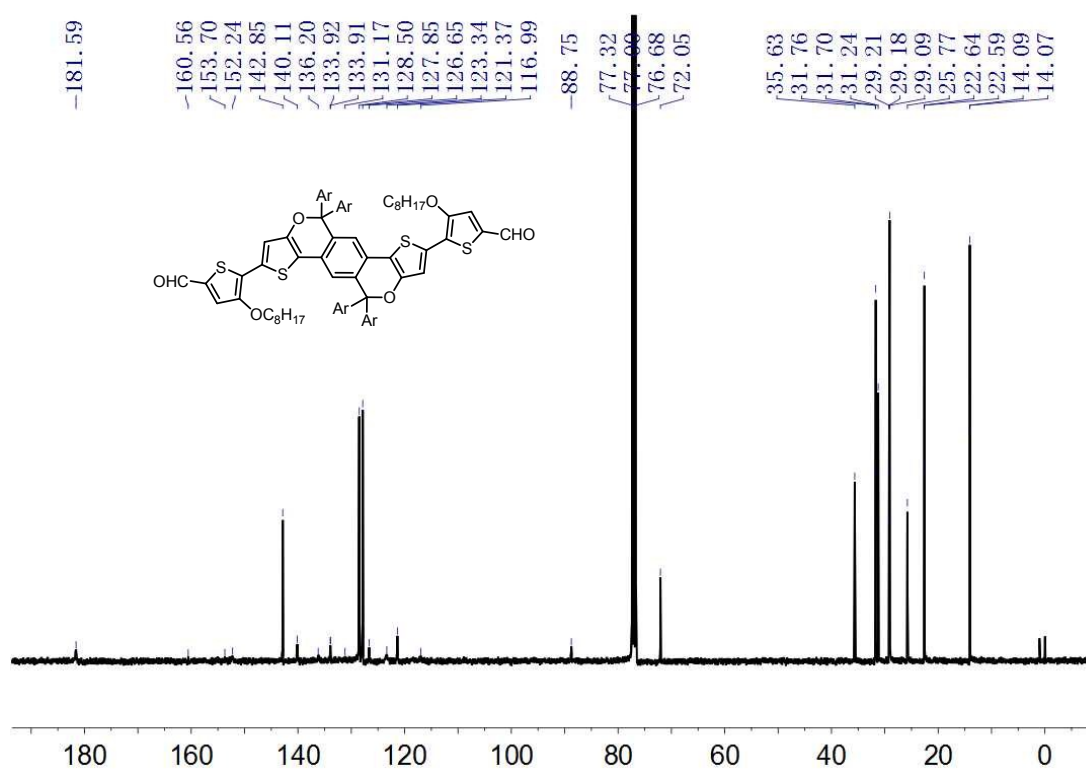

Fig. S8 <sup>13</sup>C NMR spectrum of CO5-CHO-OT.

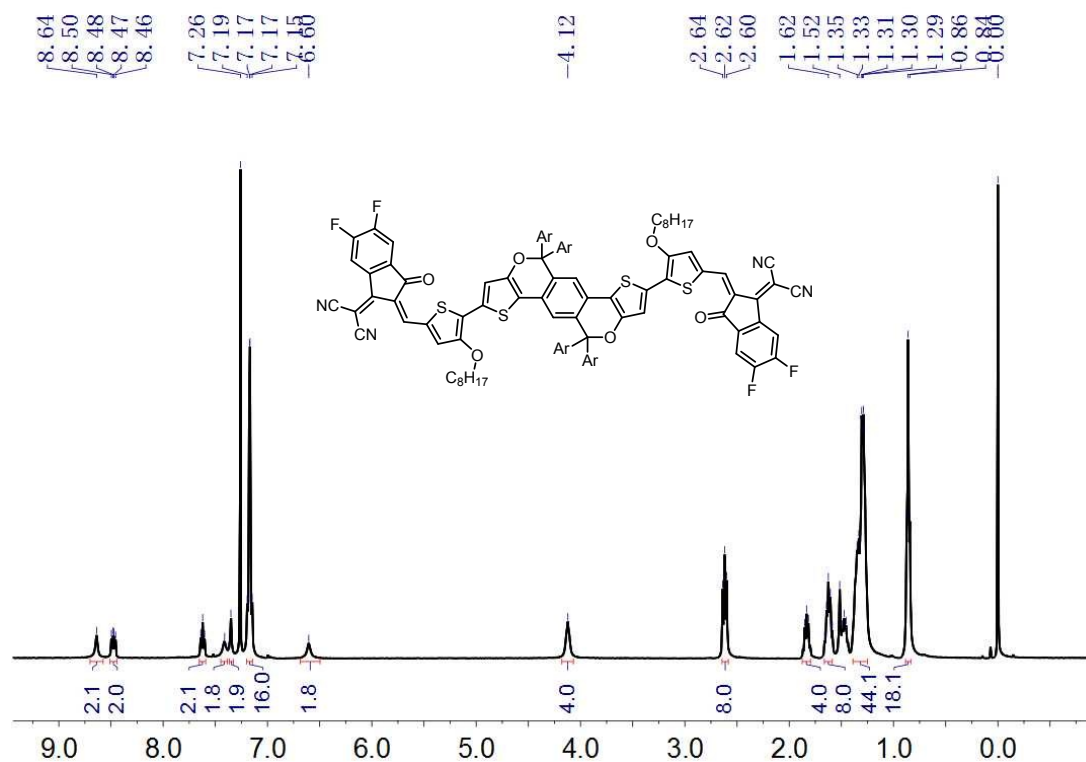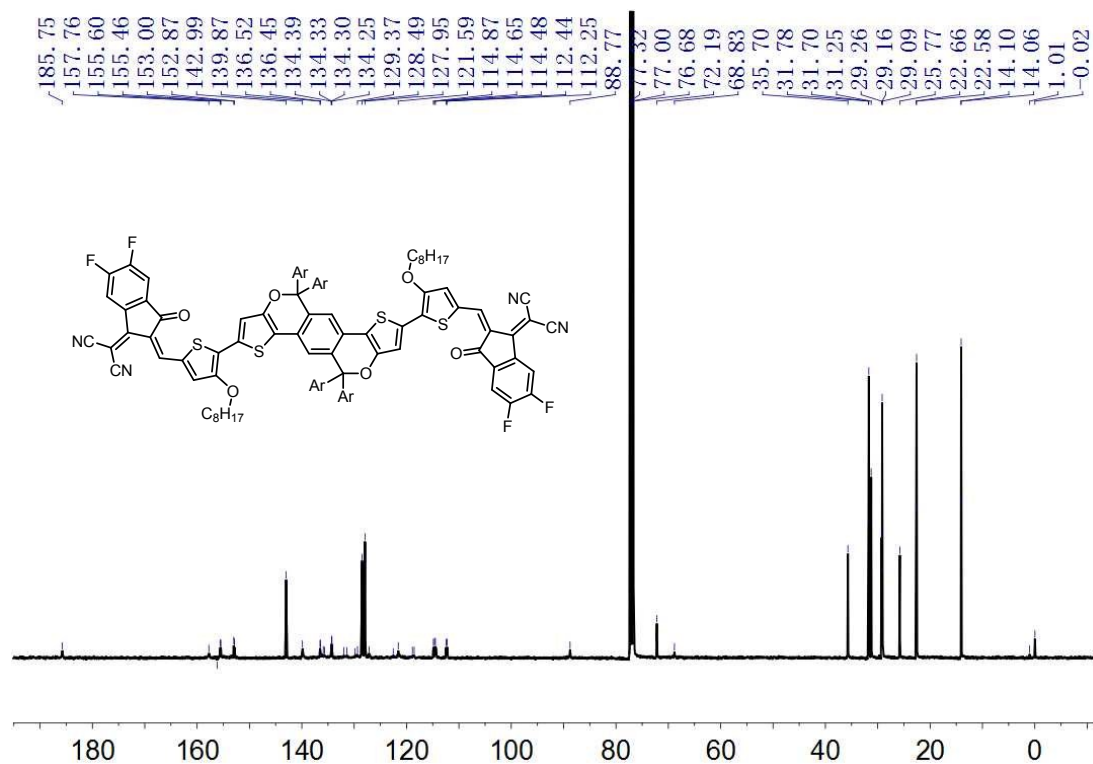

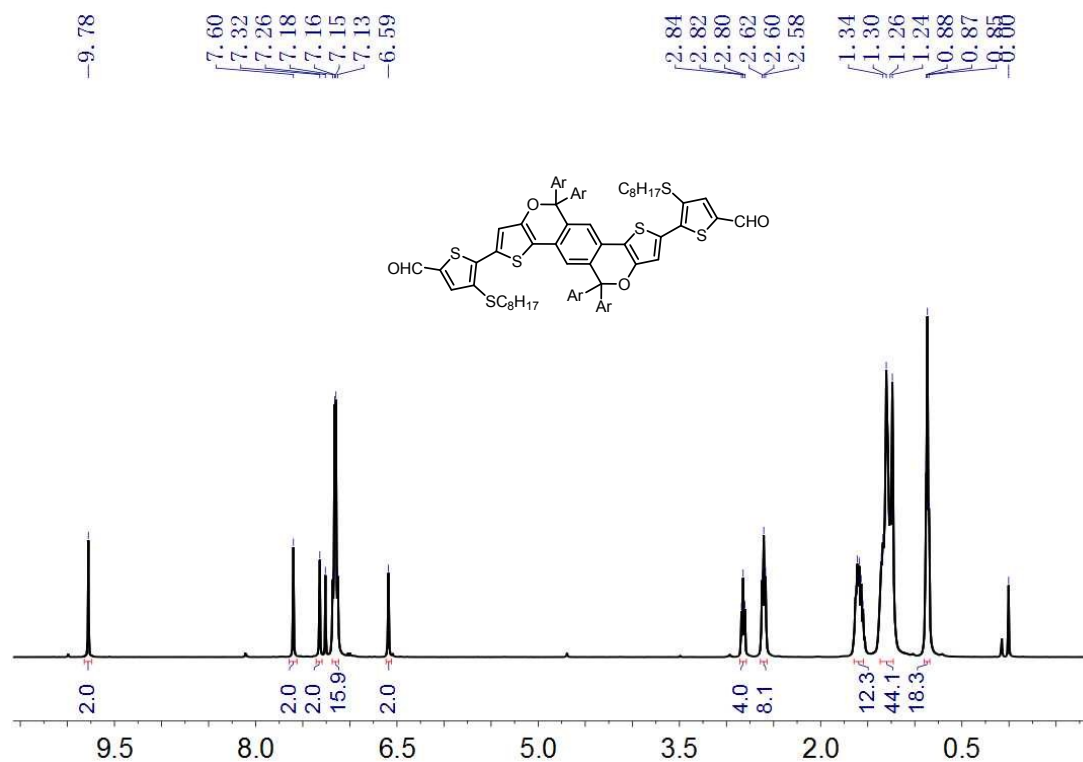

**Fig. S11**  $^1\text{H}$  NMR spectrum of **CO5-CHO-ST**.

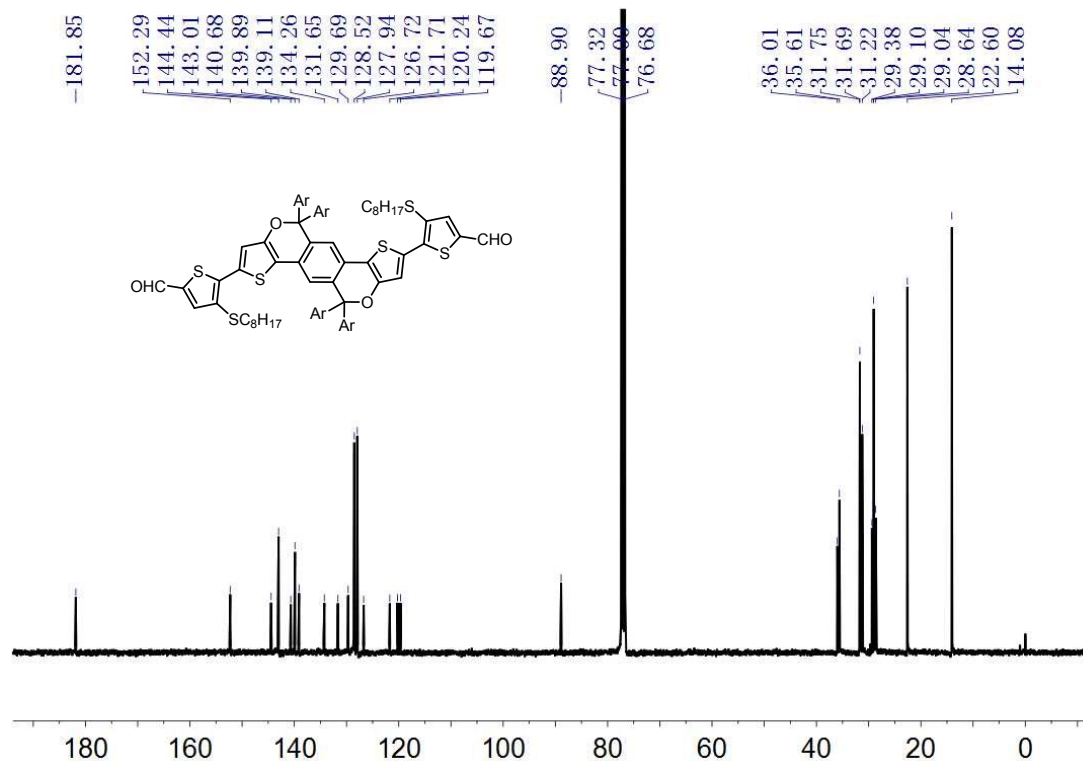

**Fig. S12**  $^{13}\text{C}$  NMR spectrum of **CO5-CHO-ST**.

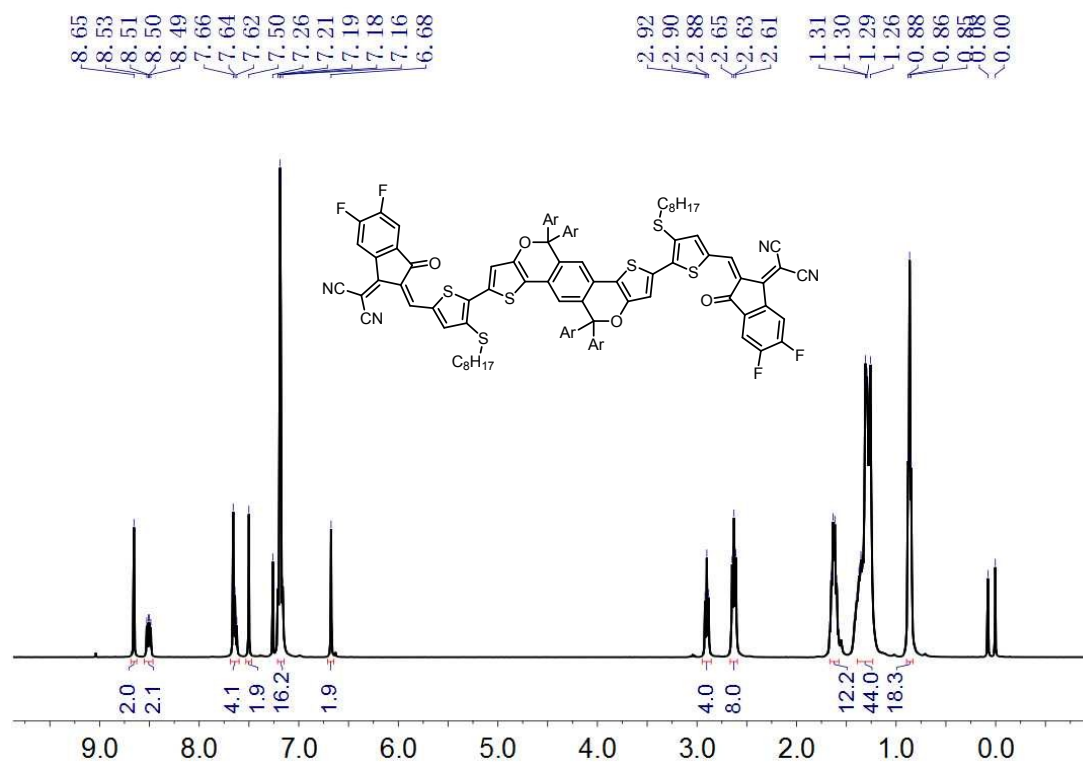

**Fig. S13** <sup>1</sup>H NMR spectrum of CO5DFIC-ST.

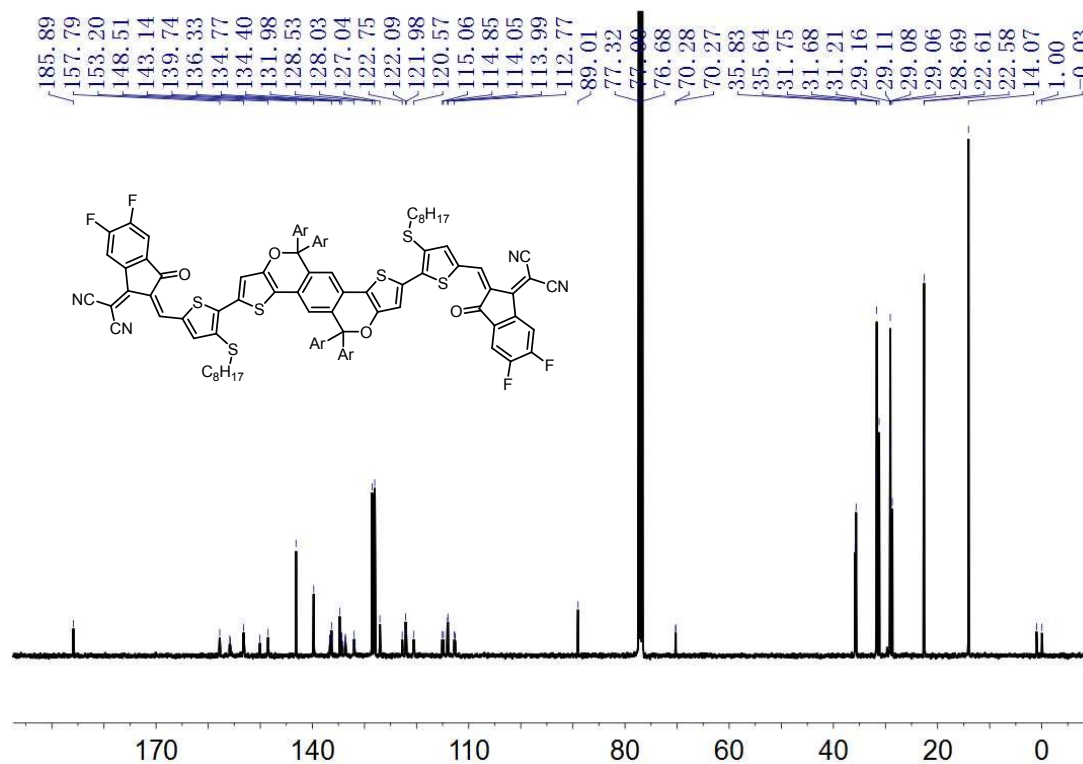

**Fig. S14** <sup>13</sup>C NMR spectrum of CO5DFIC-ST.

#### 4. UV-Vis

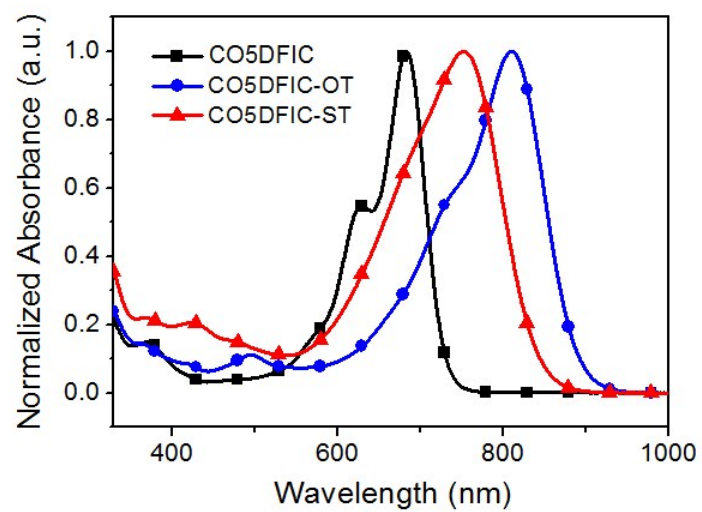

**Fig S15** Absorption spectra for CO5DFIC, CO5DFIC-OT and CO5DFIC-ST in solution.

## 5. CV

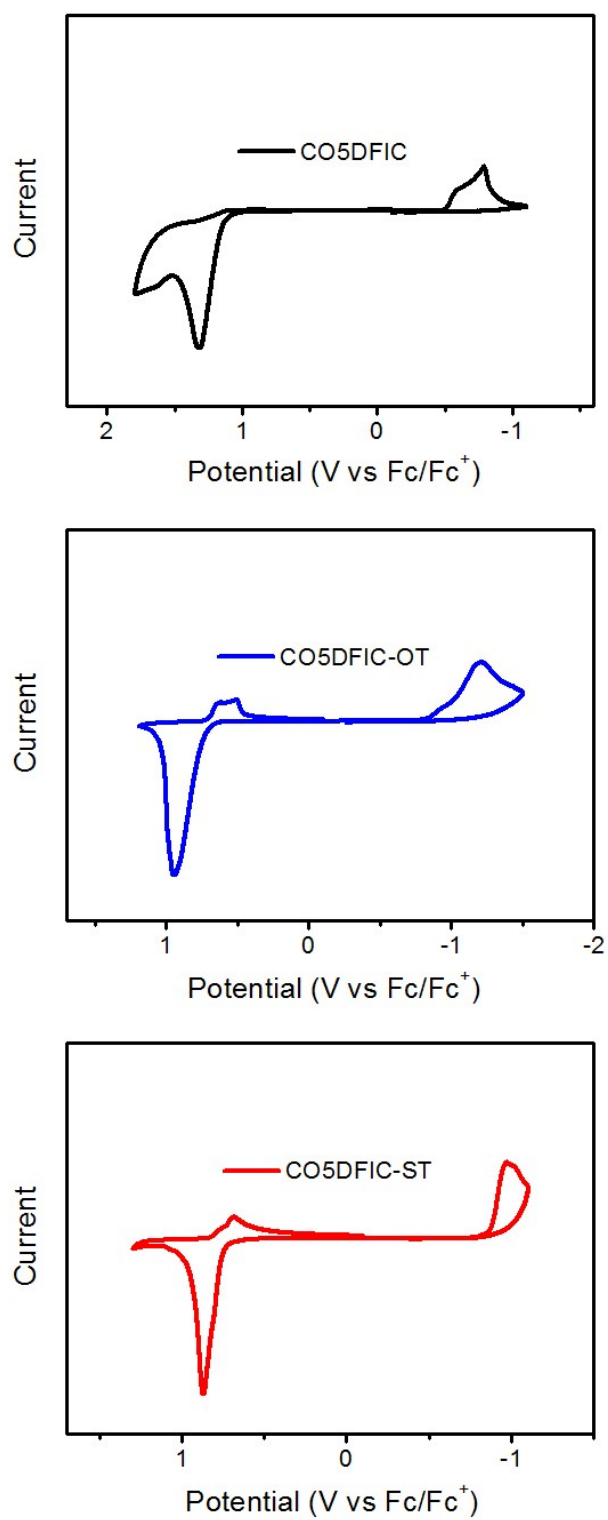

**Fig. S16** Cyclic voltammograms for CO5DFIC, CO5DFIC-OT and CO5DFIC-ST.

## 6. Device fabrication and measurements

### Inverted solar cells

The ZnO precursor solution was prepared according to literature.<sup>[4]</sup> It was spin-coated onto ITO glass (4000 rpm for 30 s). The films were annealed at 200 °C in air for 30 min. ZnO film thickness is ~30 nm. A PTB7-Th:NFA blend in chlorobenzene (CB) with 1-chloronaphthalene (CN) additive was spin-coated onto ZnO layer. MoO<sub>3</sub> (~6 nm) and Ag (~80 nm) was successively evaporated onto the active layer through a shadow mask (pressure ca. 10<sup>-4</sup> Pa). The effective area for the devices is 4 mm<sup>2</sup>. The thicknesses of the active layers were measured by using a KLA Tencor D-120 profilometer. *J-V* curves were measured by using a computerized Keithley 2400 SourceMeter and a Xenon-lamp-based solar simulator (Enli Tech, AM 1.5G, 100 mW/cm<sup>2</sup>). The illumination intensity of solar simulator was determined by using a monocrystalline silicon solar cell (Enli SRC2020, 2cm×2cm) calibrated by NIM. The external quantum efficiency (EQE) spectra were measured by using a QE-R3011 measurement system (Enli Tech).

### Hole-only devices

The structure for hole-only devices is ITO/PEDOT:PSS/PTB7-Th:NFA/MoO<sub>3</sub>/Al. A 30 nm thick PEDOT:PSS layer was made by spin-coating an aqueous dispersion onto ITO glass (4000 rpm for 30 s). PEDOT substrates were dried at 150 °C for 10 min. A PTB7-Th:NFA blend in CB with CN additive was spin-coated onto PEDOT layer. Finally, MoO<sub>3</sub> (~6 nm) and Al (~100 nm) was successively evaporated onto the active layer through a shadow mask (pressure ca. 10<sup>-4</sup> Pa). *J-V* curves were measured by using a computerized Keithley 2400 SourceMeter in the dark.

### Electron-only devices

The structure for electron-only devices is Al/PTB7-Th:NFA/Ca/Al. Al (~80 nm) was evaporated onto a glass substrate. A PTB7-Th:NFA blend in CB with CN additive was spin-coated onto Al. Ca (~5 nm) and Al (~80 nm) were successively evaporated onto the active layer through a shadow mask (pressure ca. 10<sup>-4</sup> Pa). *J-V* curves were measured by using a computerized Keithley 2400 SourceMeter in the dark.

## 7. Optimization of device performance

**Table S1** Optimization of D/A ratio for PTB7-Th:CO5DFIC inverted solar cells.<sup>a</sup>

| D/A   | $V_{oc}$ | $J_{sc}$              | FF   | PCE                      |
|-------|----------|-----------------------|------|--------------------------|
| [w/w] | [V]      | [mA/cm <sup>2</sup> ] | [%]  | [%]                      |
| 1:0.5 | 0.59     | 5.25                  | 34.7 | 1.07 (0.91) <sup>b</sup> |
| 1:1   | 0.59     | 12.56                 | 58.0 | 4.32 (4.01)              |
| 1:1.5 | 0.57     | 12.32                 | 52.1 | 3.67 (3.48)              |
| 1:2   | 0.56     | 12.36                 | 50.2 | 3.46 (3.28)              |

<sup>a</sup>Blend solution: 18 mg/mL in CB; spin-coating: 1000 rpm for 60 s.

<sup>b</sup>Data in parentheses stand for the average PCEs for 10 cells.

**Table S2** Optimization of the active layer thickness for PTB7-Th:CO5DFIC inverted solar cells.<sup>a</sup>

| Thickness | $V_{oc}$ | $J_{sc}$              | FF   | PCE                      |
|-----------|----------|-----------------------|------|--------------------------|
| [nm]      | [V]      | [mA/cm <sup>2</sup> ] | [%]  | [%]                      |
| 150       | 0.57     | 13.41                 | 43.2 | 3.31 (3.26) <sup>b</sup> |
| 116       | 0.59     | 12.56                 | 58.0 | 4.32 (4.01)              |
| 90        | 0.60     | 12.96                 | 64.8 | 5.03 (4.83)              |
| 71        | 0.60     | 12.11                 | 65.9 | 4.82 (4.57)              |
| 56        | 0.60     | 11.93                 | 64.8 | 4.65 (4.55)              |

<sup>a</sup>D/A ratio: 1:1 (w/w); blend solution: 18 mg/mL in CB.

<sup>b</sup>Data in parentheses stand for the average PCEs for 10 cells.



**Table S3** Optimization of CN content for PTB7-Th:CO5DFIC inverted solar cells.<sup>a</sup>

| CN     | $V_{oc}$ | $J_{sc}$              | FF   | PCE                      |
|--------|----------|-----------------------|------|--------------------------|
| [vol%] | [V]      | [mA/cm <sup>2</sup> ] | [%]  | [%]                      |
| 0      | 0.60     | 12.96                 | 64.8 | 5.03 (4.83) <sup>b</sup> |
| 0.5    | 0.58     | 14.13                 | 63.3 | 5.19 (4.98)              |
| 1      | 0.58     | 14.33                 | 65.6 | 5.46 (5.26)              |
| 3      | 0.58     | 14.19                 | 67.4 | 5.58 (5.37)              |
| 5      | 0.56     | 14.35                 | 68.0 | 5.51 (5.31)              |
| 7      | 0.56     | 13.80                 | 68.1 | 5.26 (5.16)              |

<sup>a</sup>D/A ratio: 1:1 (w/w); blend solution: 18 mg/mL in CB; spin-coating: 1500 rpm for 60 s.

<sup>b</sup>Data in parentheses stand for the average PCEs for 10 cells.

**Table S4** Optimization of D/A ratio for PTB7-Th:CO5DFIC-OT inverted solar cells.<sup>a</sup>

| D/A   | $V_{oc}$ | $J_{sc}$              | FF   | PCE                      |
|-------|----------|-----------------------|------|--------------------------|
| [w/w] | [V]      | [mA/cm <sup>2</sup> ] | [%]  | [%]                      |
| 1:0.5 | 0.73     | 13.92                 | 44.1 | 4.46 (4.28) <sup>b</sup> |
| 1:1   | 0.71     | 17.32                 | 47.9 | 5.94 (5.55)              |
| 1:1.5 | 0.71     | 17.49                 | 56.2 | 6.97 (6.45)              |
| 1:2   | 0.69     | 15.73                 | 45.2 | 4.94 (4.71)              |

<sup>a</sup>Blend solution: 18 mg/mL in CB; spin-coating: 1500 rpm for 60 s.

<sup>b</sup>Data in parentheses stand for the average PCEs for 10 cells.

**Table S5** Optimization of the active layer thickness for PTB7-Th:CO5DFIC-OT inverted solar cells.<sup>a</sup>

| Thickness | $V_{oc}$ | $J_{sc}$              | FF   | PCE                      |
|-----------|----------|-----------------------|------|--------------------------|
| [nm]      | [V]      | [mA/cm <sup>2</sup> ] | [%]  | [%]                      |
| 145       | 0.71     | 15.28                 | 49.6 | 5.37 (5.20) <sup>b</sup> |
| 96        | 0.71     | 16.05                 | 53.4 | 6.10 (5.99)              |
| 85        | 0.71     | 17.49                 | 56.2 | 6.97 (6.45)              |
| 70        | 0.71     | 14.59                 | 56.5 | 5.88 (5.70)              |
| 62        | 0.72     | 14.08                 | 56.0 | 5.65 (5.57)              |

<sup>a</sup>D/A ratio: 1:1.5 (w/w); blend solution: 18 mg/mL in CB.

<sup>b</sup>Data in parentheses stand for the average PCEs for 10 cells.

**Table S6** Optimization of CN content for PTB7-Th:CO5DFIC-OT inverted solar cells.<sup>a</sup>

| CN     | $V_{oc}$ | $J_{sc}$              | FF   | PCE                      |
|--------|----------|-----------------------|------|--------------------------|
| [vol%] | [V]      | [mA/cm <sup>2</sup> ] | [%]  | [%]                      |
| 0      | 0.71     | 17.49                 | 56.2 | 6.97 (6.45) <sup>b</sup> |
| 0.5    | 0.71     | 17.72                 | 58.0 | 7.30 (7.11)              |
| 1      | 0.71     | 18.09                 | 57.9 | 7.40 (7.18)              |
| 3      | 0.71     | 17.58                 | 61.0 | 7.66 (7.37)              |
| 5      | 0.72     | 16.92                 | 61.2 | 7.42 (7.14)              |
| 7      | 0.71     | 16.55                 | 61.6 | 7.29 (6.98)              |

<sup>a</sup>D/A ratio: 1:1.5 (w/w); blend solution: 18 mg/mL in CB; spin-coating: 1500 rpm for 60 s.

<sup>b</sup>Data in parentheses stand for the average PCEs for 10 cells.

**Table S7** Optimization of D/A ratio for PTB7-Th:CO5DFIC-ST inverted solar cells.<sup>a</sup>

| D/A   | $V_{oc}$ | $J_{sc}$              | FF   | PCE                      |
|-------|----------|-----------------------|------|--------------------------|
| [w/w] | [V]      | [mA/cm <sup>2</sup> ] | [%]  | [%]                      |
| 1:0.5 | 0.75     | 15.46                 | 43.5 | 5.02 (4.92) <sup>b</sup> |
| 1:1   | 0.74     | 19.23                 | 59.1 | 8.45 (8.00)              |
| 1:1.5 | 0.75     | 19.82                 | 59.3 | 8.78 (8.43)              |
| 1:2   | 0.75     | 19.21                 | 61.8 | 8.85 (8.50)              |
| 1:2.5 | 0.74     | 20.62                 | 59.5 | 9.07 (8.61)              |
| 1:3   | 0.74     | 18.53                 | 60.6 | 8.37 (8.05)              |

<sup>a</sup>Blend solution: 18 mg/mL in CB with 0.5 vol% CN; spin-coating: 1500 rpm for 60 s.

<sup>b</sup>Data in parentheses stand for the average PCEs for 10 cells.

**Table S8** Optimization of the active layer thickness for PTB7-Th:CO5DFIC-ST inverted solar cells.<sup>a</sup>

| Thickness | $V_{oc}$ | $J_{sc}$              | FF   | PCE                      |
|-----------|----------|-----------------------|------|--------------------------|
| [nm]      | [V]      | [mA/cm <sup>2</sup> ] | [%]  | [%]                      |
| 151       | 0.73     | 18.70                 | 49.2 | 6.74 (6.52) <sup>b</sup> |
| 116       | 0.74     | 18.68                 | 60.6 | 8.36 (8.15)              |
| 102       | 0.74     | 20.62                 | 59.5 | 9.07 (8.61)              |
| 84        | 0.74     | 18.37                 | 62.6 | 8.47 (8.42)              |
| 75        | 0.73     | 18.25                 | 62.8 | 8.42 (8.25)              |

<sup>a</sup>D/A ratio: 1:2.5 (w/w); blend solution: 18 mg/mL in CB with 0.5 vol% CN.

<sup>b</sup>Data in parentheses stand for the average PCEs for 10 cells.

**Table S9** Optimization of CN content for PTB7-Th:CO5DFIC-ST inverted solar cells.<sup>a</sup>

| CN<br>[vol%] | $V_{oc}$<br>[V] | $J_{sc}$<br>[mA/cm <sup>2</sup> ] | FF<br>[%] | PCE<br>[%]               |
|--------------|-----------------|-----------------------------------|-----------|--------------------------|
| 0            | 0.74            | 19.58                             | 59.5      | 8.58 (8.29) <sup>b</sup> |
| 0.5          | 0.74            | 20.62                             | 59.5      | 9.07 (8.61)              |
| 1            | 0.73            | 20.79                             | 60.0      | 9.15 (9.09)              |
| 3            | 0.74            | 20.71                             | 63.7      | 9.73 (9.37)              |
| 5            | 0.74            | 20.53                             | 63.7      | 9.63 (9.32)              |
| 7            | 0.74            | 20.12                             | 63.4      | 9.48 (9.10)              |

<sup>a</sup>D/A ratio: 1:2.5 (w/w); blend solution: 18 mg/mL in CB; spin-coating: 1500 rpm for 60 s.

<sup>b</sup>Data in parentheses stand for the average PCEs for 10 cells.

## 8. Exciton dissociation probabilities

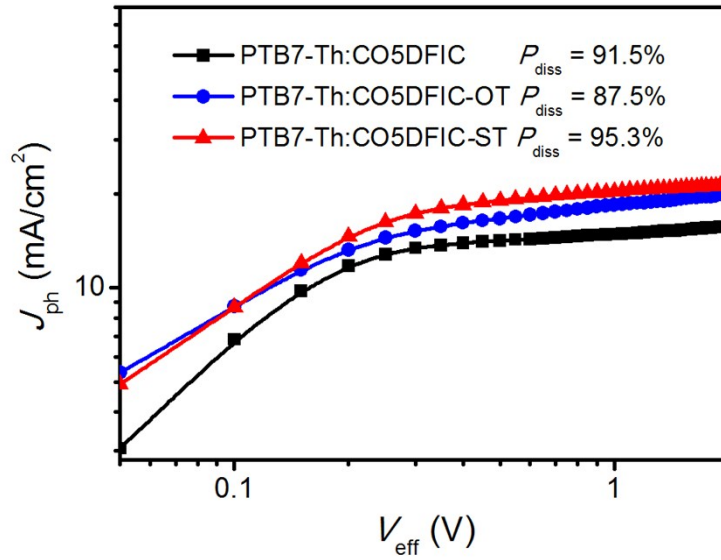

**Fig. S17**  $J_{ph}$ - $V_{eff}$  plots.

## 9. SCLC

Charge carrier mobility was measured by SCLC method. The mobility was determined by fitting the dark current to the model of a single carrier SCLC, which is described by:

$$J = \frac{9}{8} \epsilon_0 \epsilon_r \mu \frac{V^2}{d^3}$$

where  $J$  is the current density,  $\mu$  is the zero-field mobility of holes ( $\mu_h$ ) or electrons ( $\mu_e$ ),  $\epsilon_0$  is the permittivity of the vacuum,  $\epsilon_r$  is the relative permittivity of the material,  $d$  is the thickness of the blend film, and  $V$  is the effective voltage ( $V = V_{appl} - V_{bi}$ , where  $V_{appl}$  is the applied voltage, and  $V_{bi}$  is the built-in potential determined by electrode work function difference). Here,  $V_{bi} = 0.1$  V for hole-only devices,  $V_{bi} = 0$  V for electron-only devices.<sup>[5]</sup> The mobility was calculated from the slope of  $J^{1/2}$ - $V$  plots.

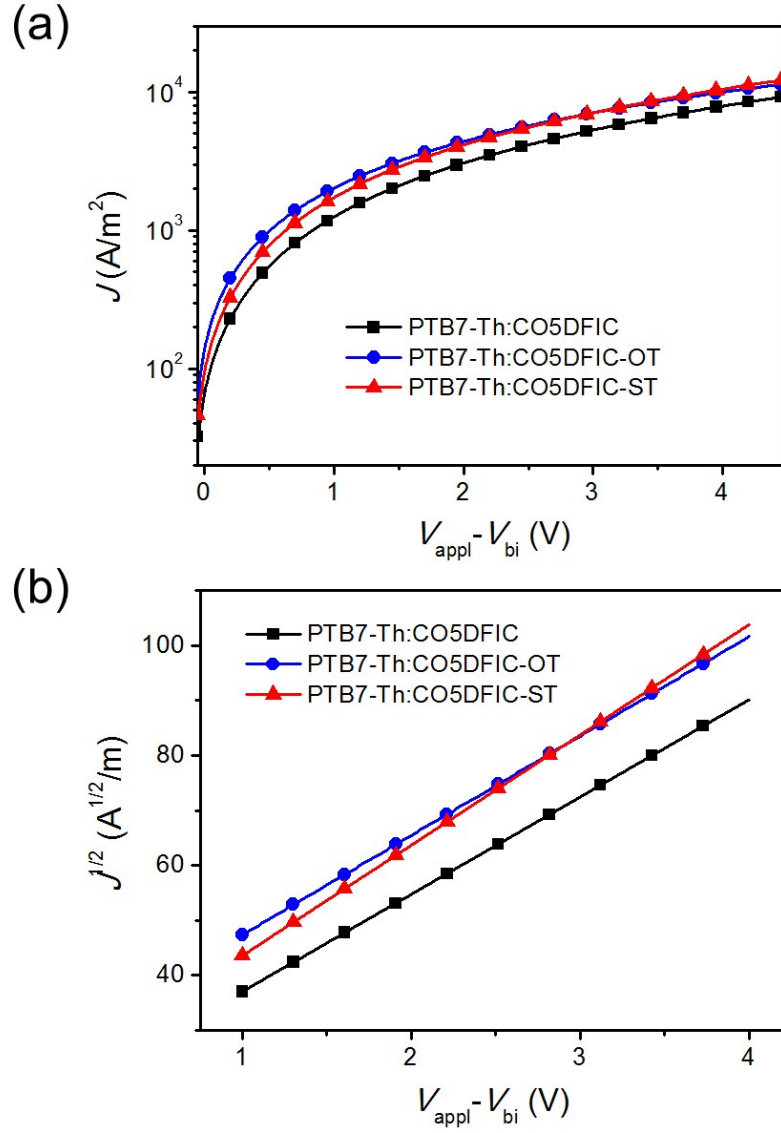

**Fig. S18**  $J$ - $V$  curves (a) and corresponding  $J^{1/2}$ - $V$  plots (b) for the hole-only devices (in dark). The thicknesses for PTB7-Th:CO5DFIC, PTB7-Th:CO5DFIC-OT and PTB7-Th:CO5DFIC-ST blend films are 90 nm, 84 nm and 100 nm, respectively.

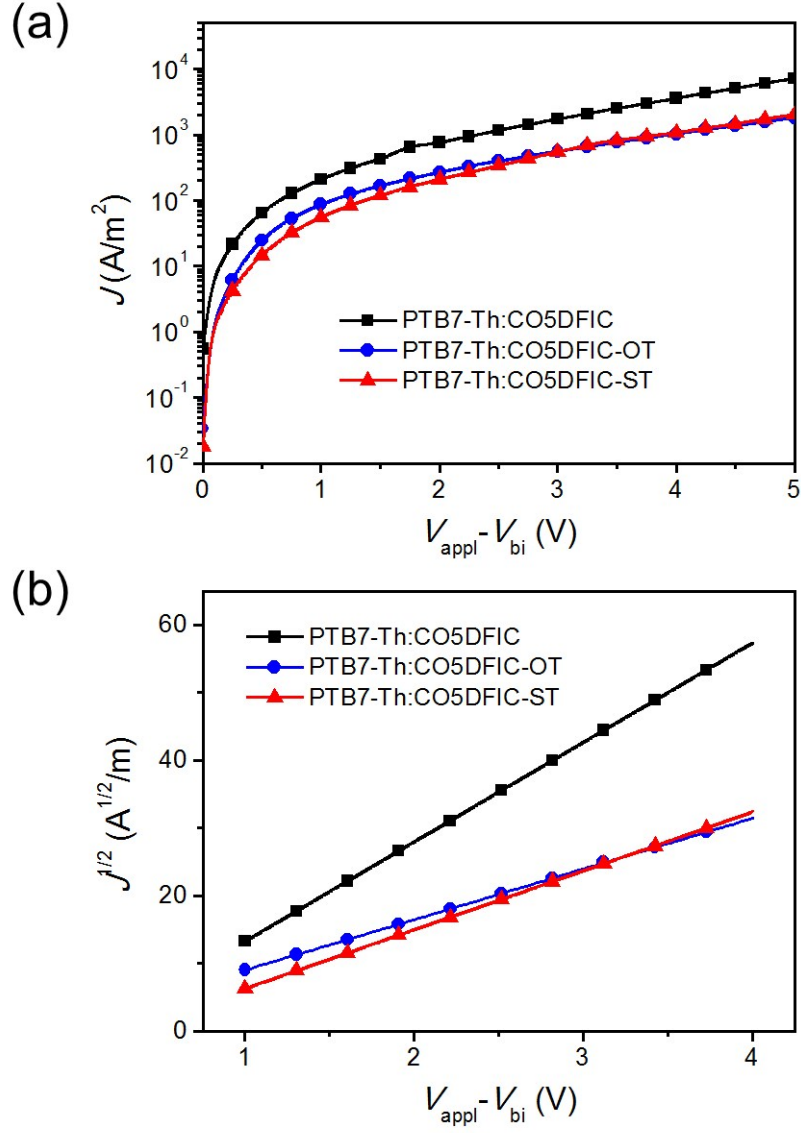

**Fig. S19**  $J$ - $V$  curves (a) and corresponding  $J^{1/2}$ - $V$  plots (b) for the electron-only devices (in dark). The thicknesses for PTB7-Th:CO5DFIC, PTB7-Th:CO5DFIC-OT and PTB7-Th:CO5DFIC-ST blend films are 90 nm, 84 nm and 100 nm, respectively.

**Table S10** Hole and electron mobilities for PTB7-Th:NFA blend films.

| PTB7-Th:NFA        | $\mu_h$<br>[cm <sup>2</sup> V <sup>-1</sup> s <sup>-1</sup> ] | $\mu_e$<br>[cm <sup>2</sup> V <sup>-1</sup> s <sup>-1</sup> ] | $\mu_h/\mu_e$ |
|--------------------|---------------------------------------------------------------|---------------------------------------------------------------|---------------|
| PTB7-Th:CO5DFIC    | $7.53 \times 10^{-5}$                                         | $4.09 \times 10^{-5}$                                         | 1.8           |
| PTB7-Th:CO5DFIC-OT | $7.86 \times 10^{-5}$                                         | $8.60 \times 10^{-6}$                                         | 9.1           |
| PTB7-Th:CO5DFIC-ST | $1.32 \times 10^{-4}$                                         | $1.97 \times 10^{-5}$                                         | 6.7           |

## 10. Bimolecular recombination

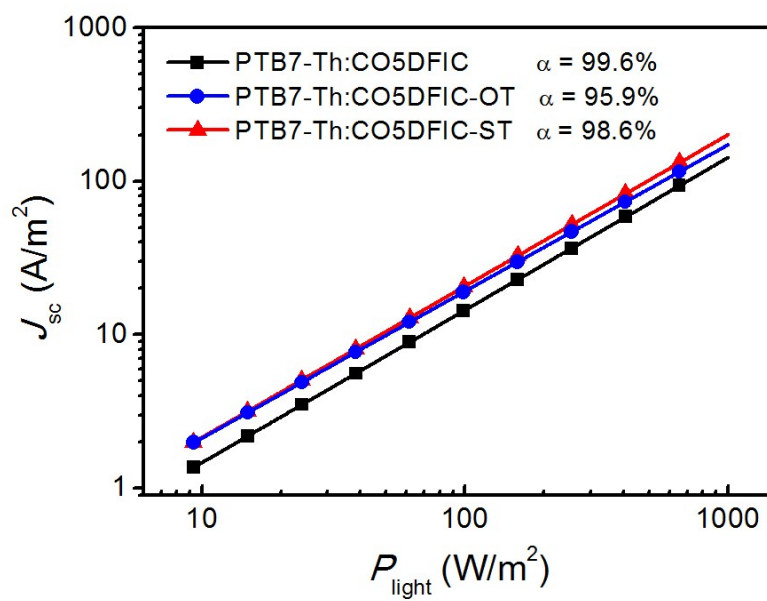

**Fig. S20**  $J_{sc}$ - $P_{light}$  plots.



## 11. AFM

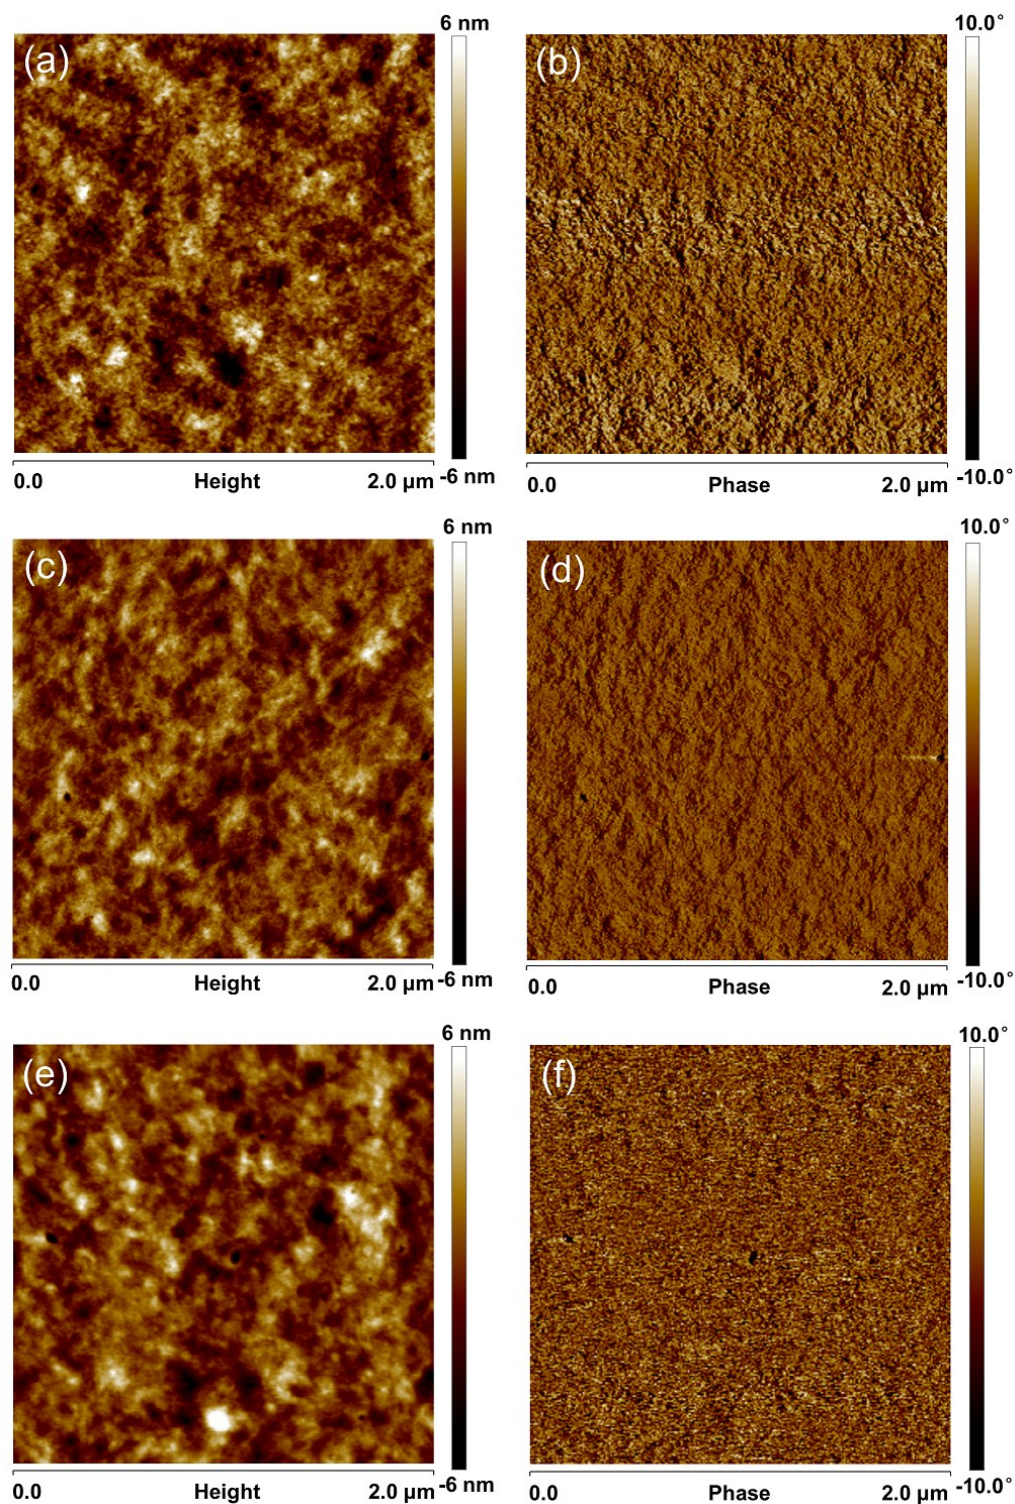

**Fig. S21** AFM height (left) and phase (right) images for the blend films. (a) and (b), PTB7-Th:CO5DFIC film with 3 vol% CN ( $R_{\text{rms}} = 3.67$  nm); (c) and (d), PTB7-Th:CO5DFIC-OT film with 3 vol% CN ( $R_{\text{rms}} = 1.86$  nm); (e) and (f), PTB7-Th:CO5DFIC-ST film with 3 vol% CN ( $R_{\text{rms}} = 2.69$  nm).  $R_{\text{rms}}$ : root-mean-square roughness.

## References

- [1] Z. Xiao, F. Liu, X. Geng, J. Zhang, S. Wang, Y. Xie, Z. Li, H. Yang, Y. Yuan and L. Ding, *Sci. Bull.*, 2017, **62**, 1331.
- [2] A. Balasubramanian, T. Ku, H. Shih, A. Suman, H. Lin, T. Shih and C. Han, *Polym. Chem.*, 2014, **5**, 5928.
- [3] H. Yao, Y. Chen, Y. Qin, R. Yu, Y. Cui, B. Yang, S. Li, K. Zhang and J. Hou, *Adv. Mater.*, 2016, **28**, 8283.
- [4] Y. Sun, J. H. Seo, C. J. Takacs, J. Seifter and A. J. Heeger, *Adv. Mater.*, 2011, **23**, 1679.
- [5] C. Duan, W. Cai, B. Hsu, C. Zhong, K. Zhang, C. Liu, Z. Hu, F. Huang, G. C. Bazan, A. J. Heeger and Y. Cao, *Energy Environ. Sci.*, 2013, **6**, 3022.
